# Supplementary material for: Cumulative mechanisms of lymphoid tissue fibrosis and T cell depletion in HIV-1 and SIV infections
Source: JCI journal article supplement (doi:10.1172/jci45157), 2011-02-18
Supplement: sd1 [file 1]

# Supplemental Figure 1

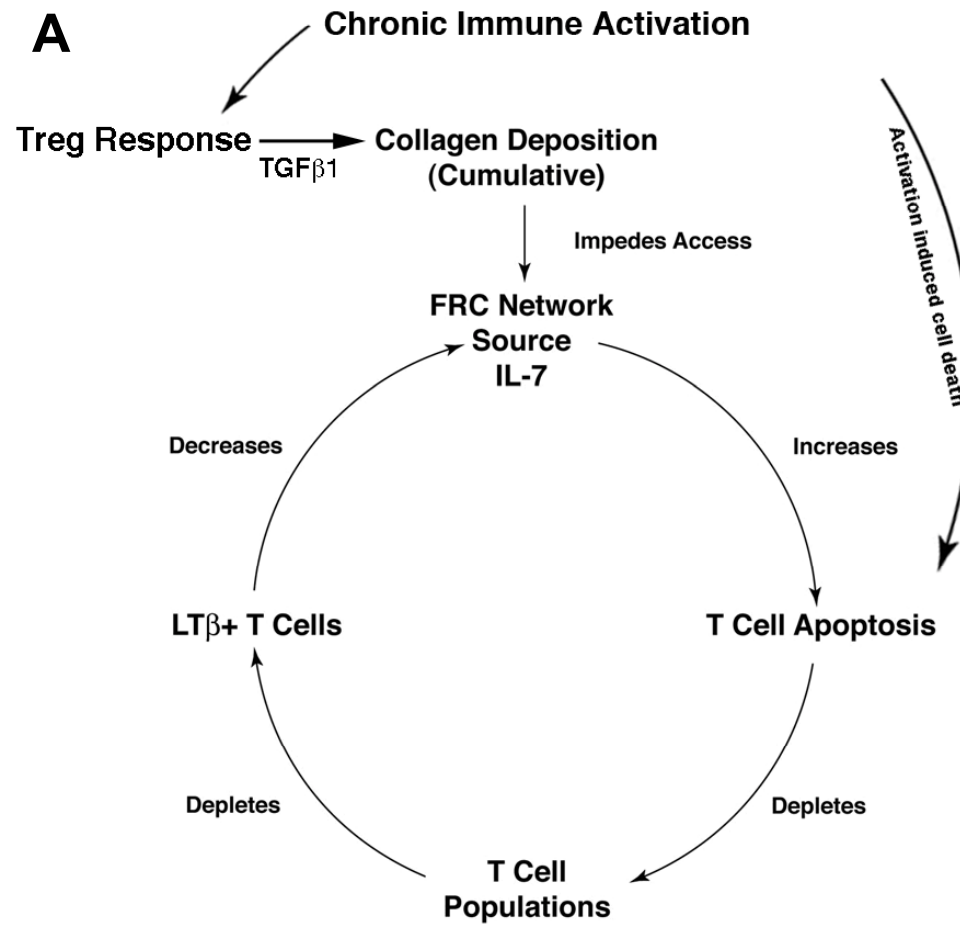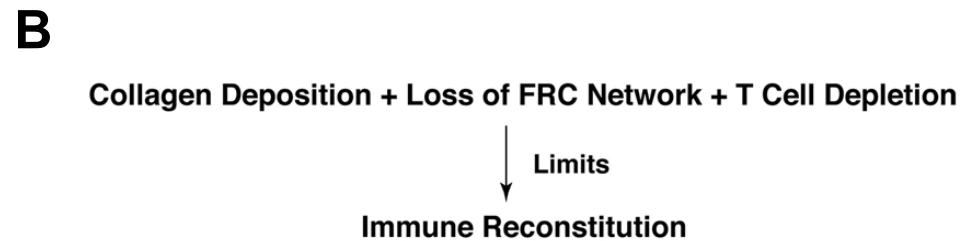

# Supplemental Figure 2

**A**

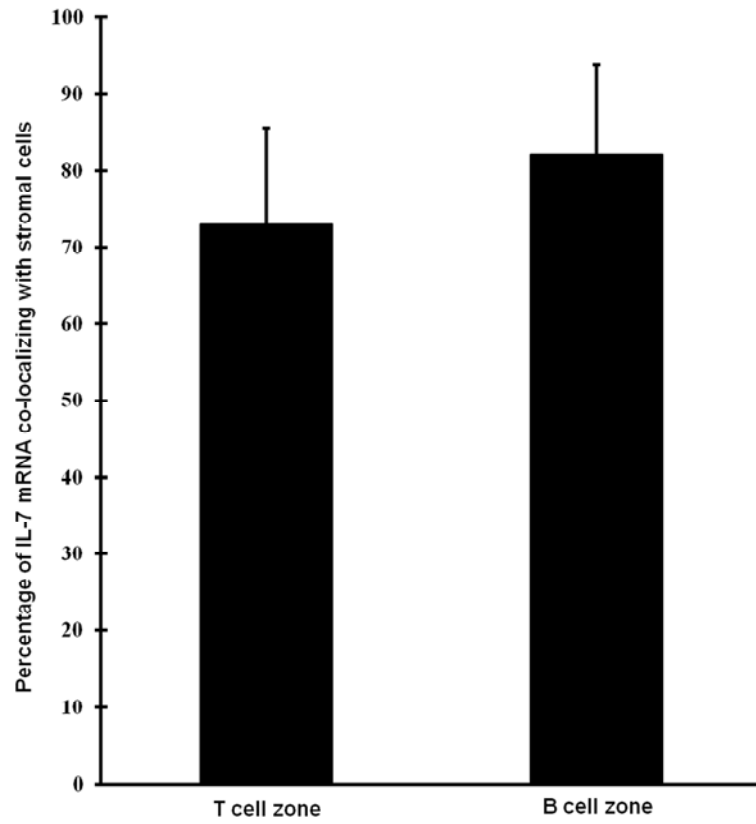

**B**

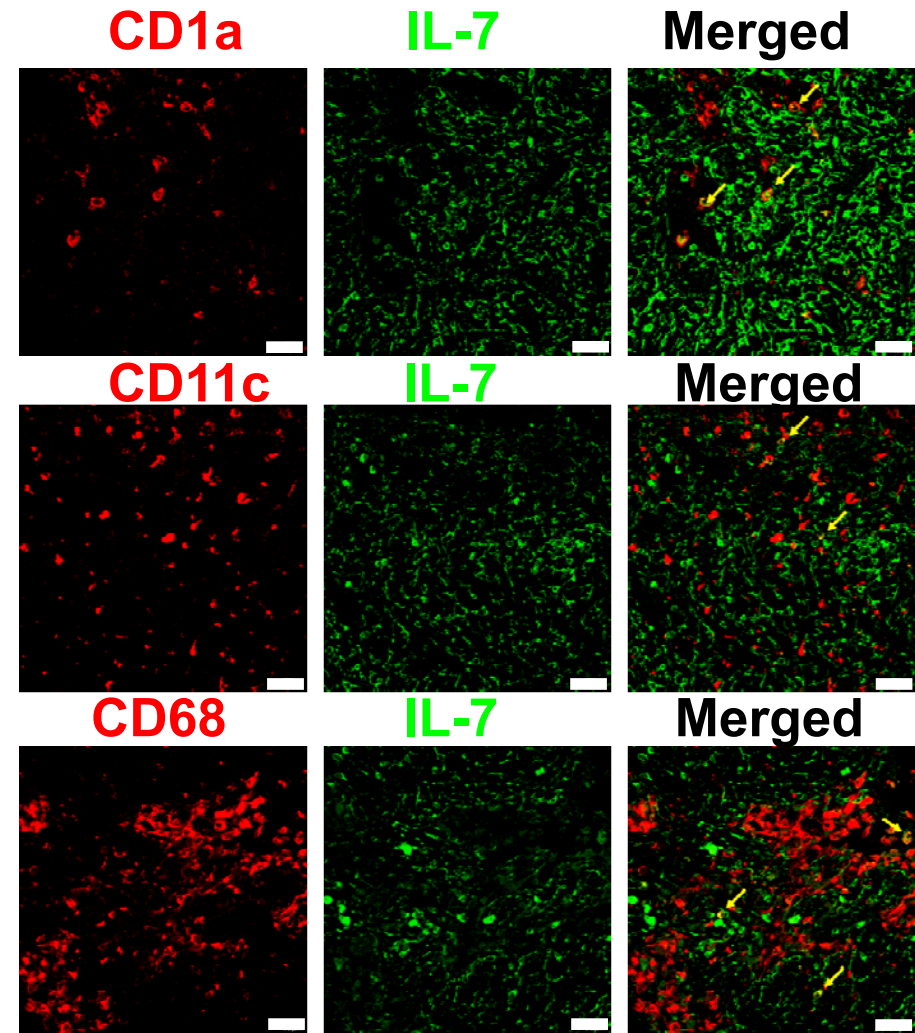

# Supplemental Figure 3

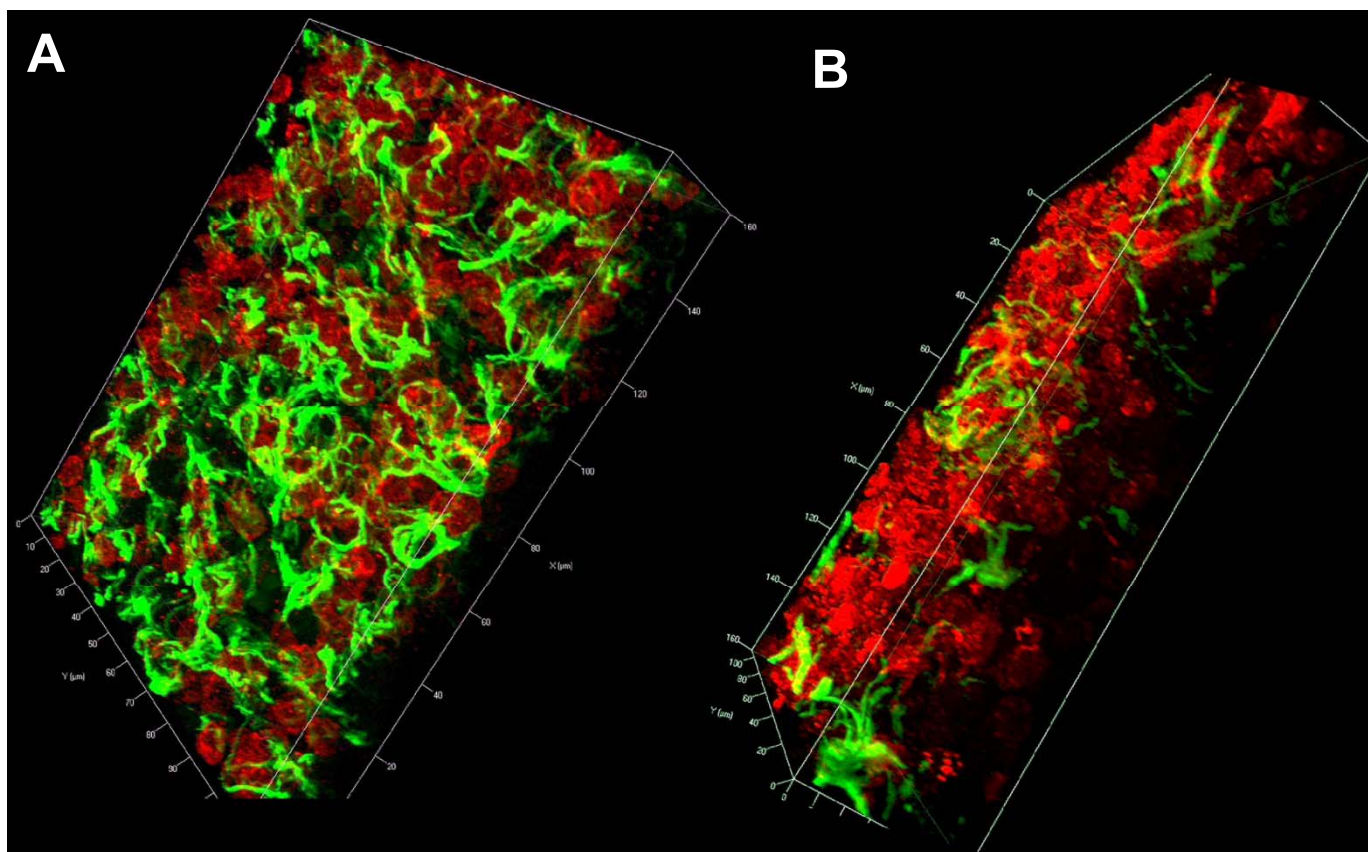

# Supplemental Figure 4

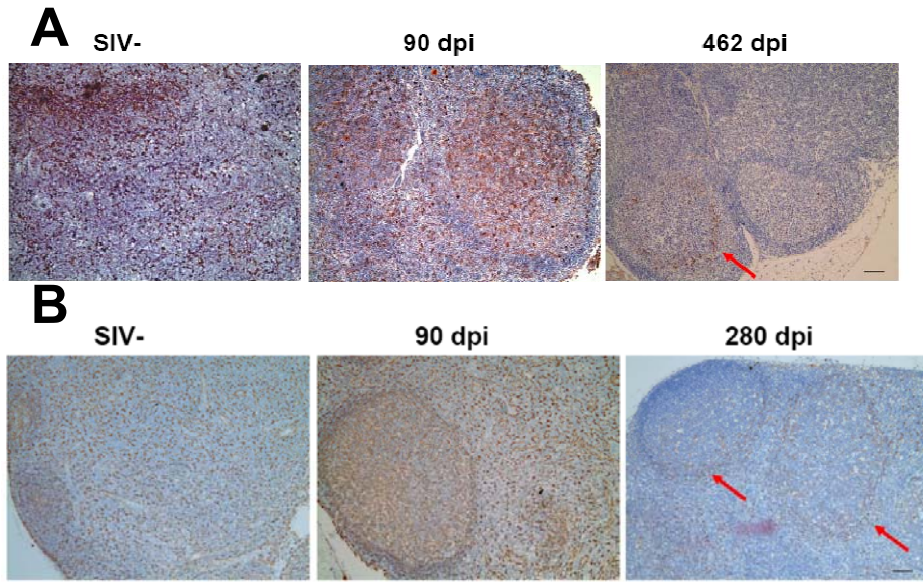

**C**

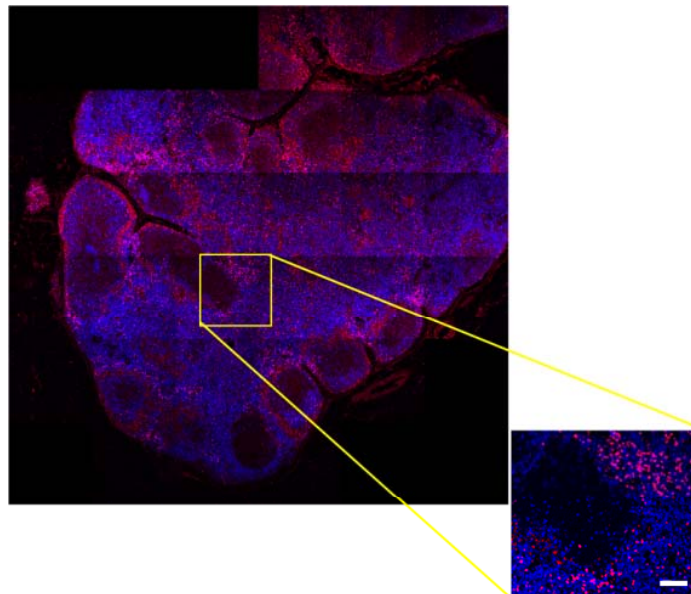

**D**

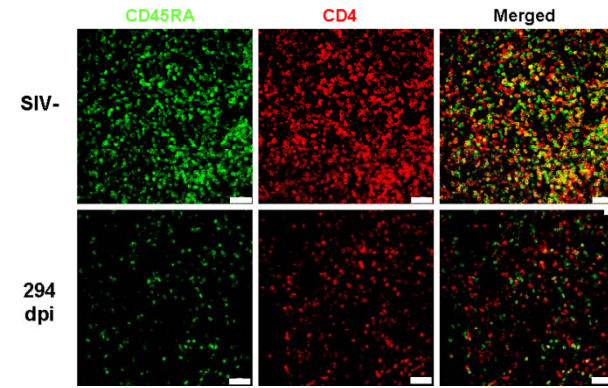

**E**

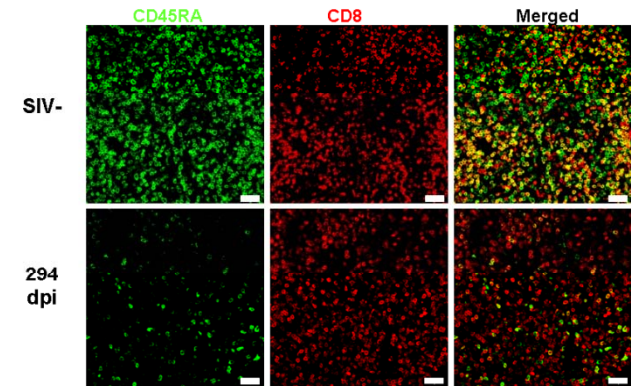

**F**

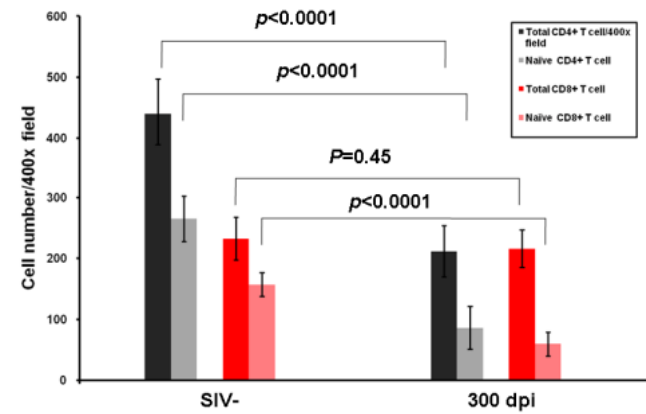

# Supplemental Figure 5

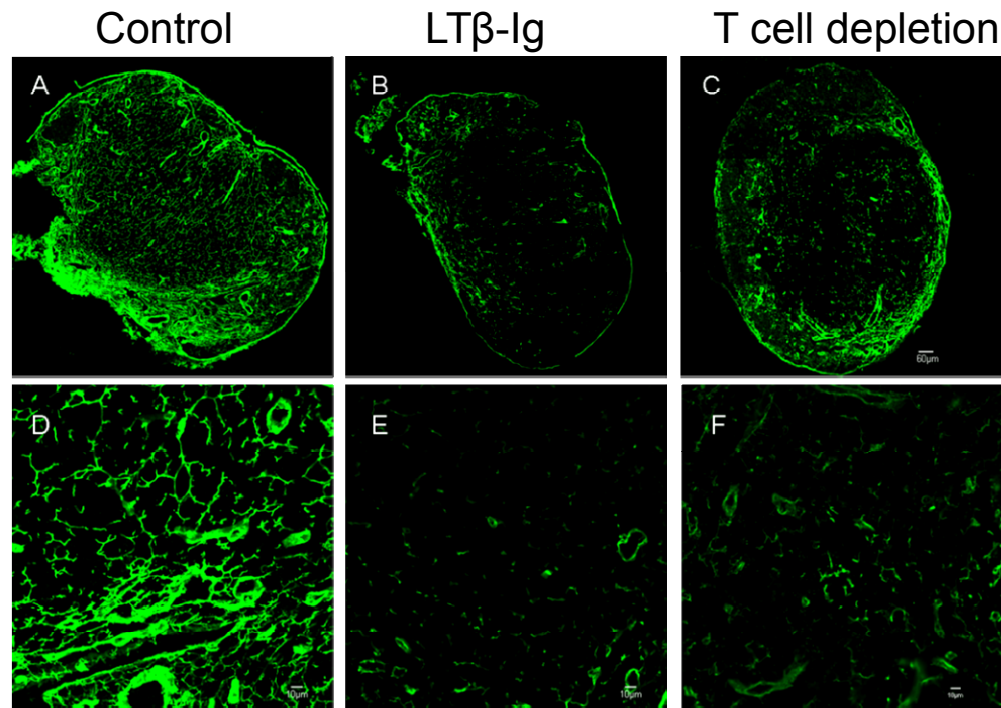

**G**

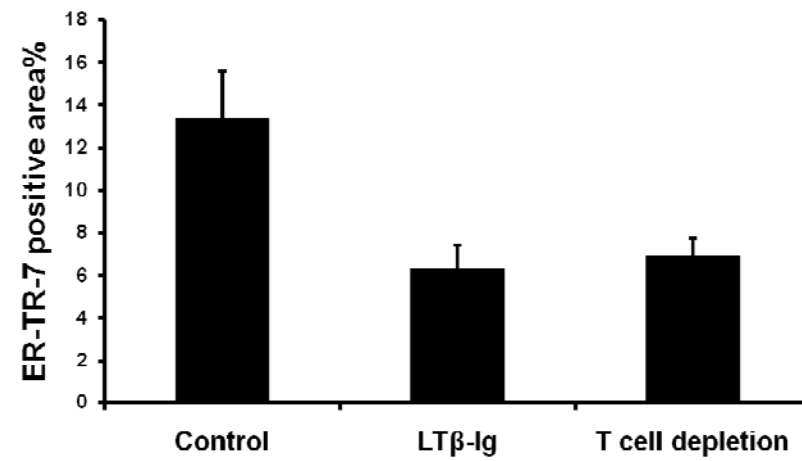

# Supplemental Figure 6

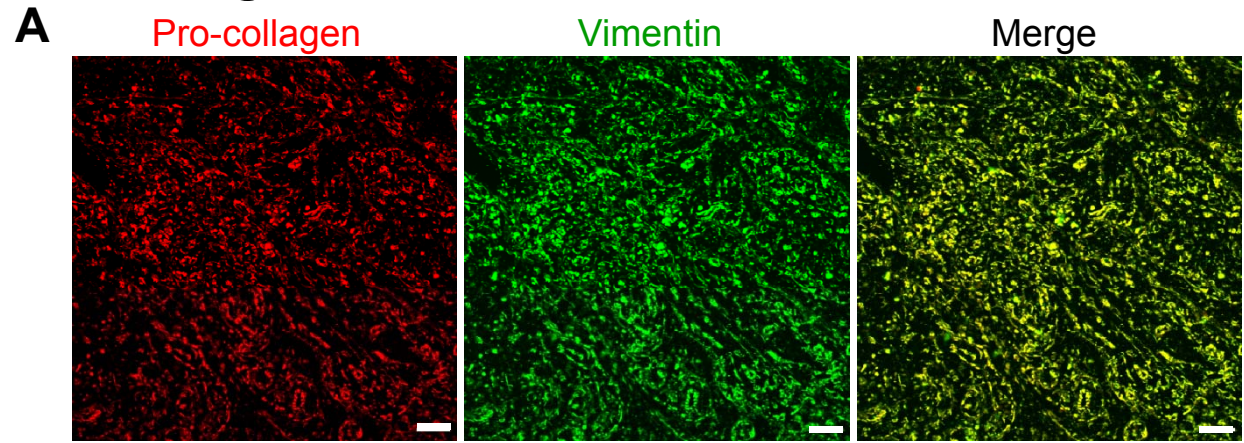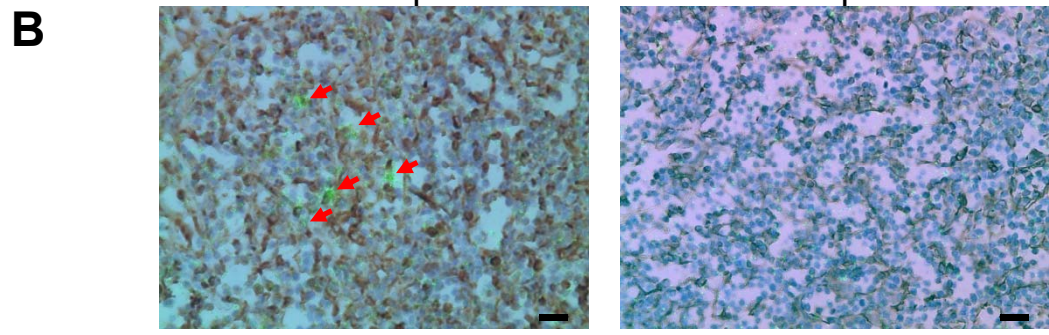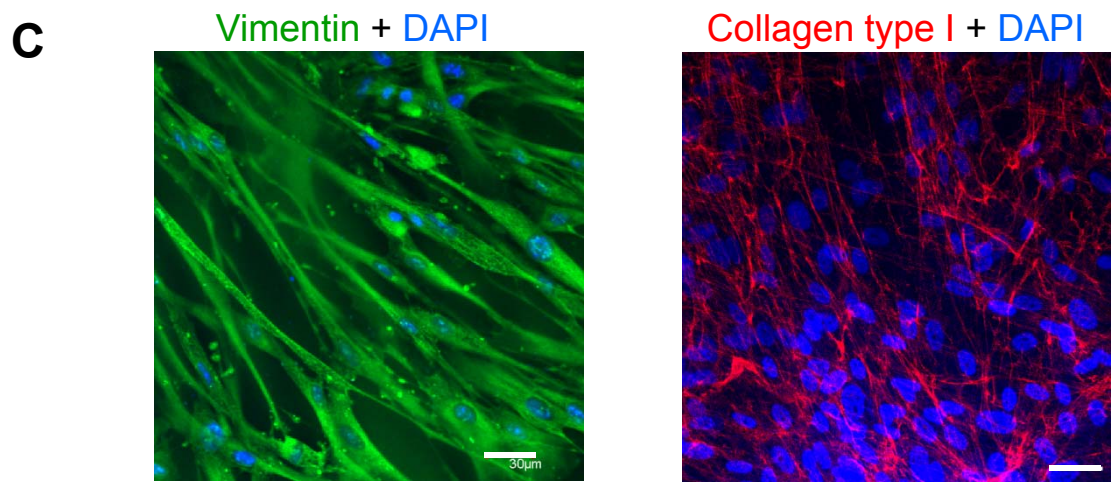

# Supplemental Figure 7

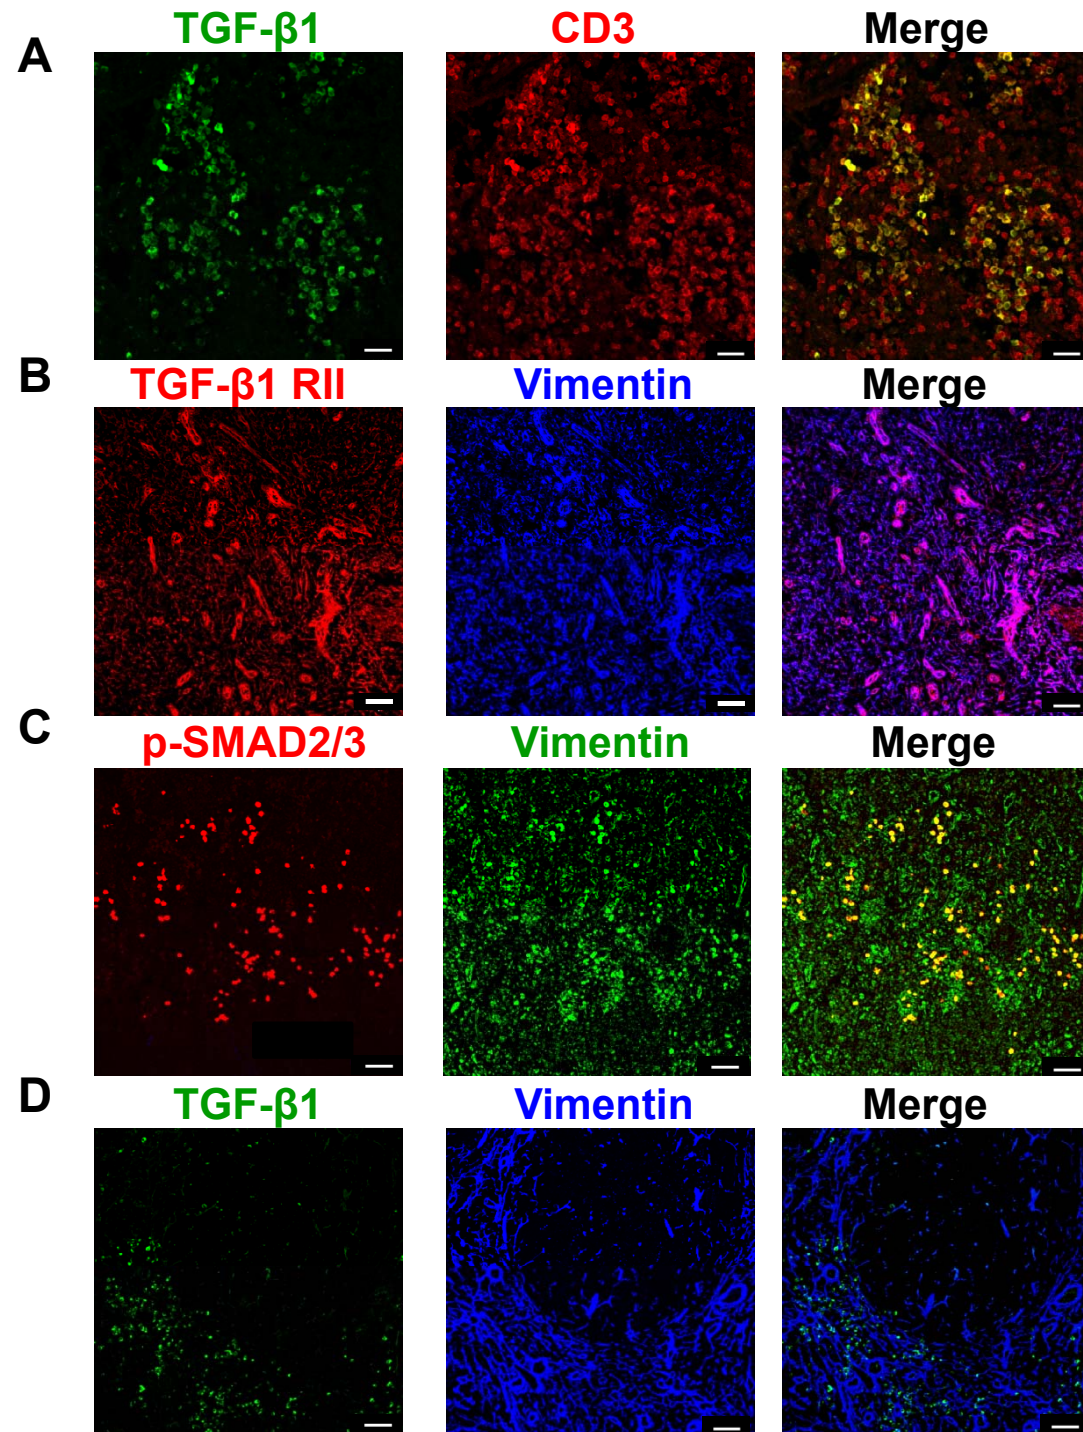

## Supplemental Figure 8

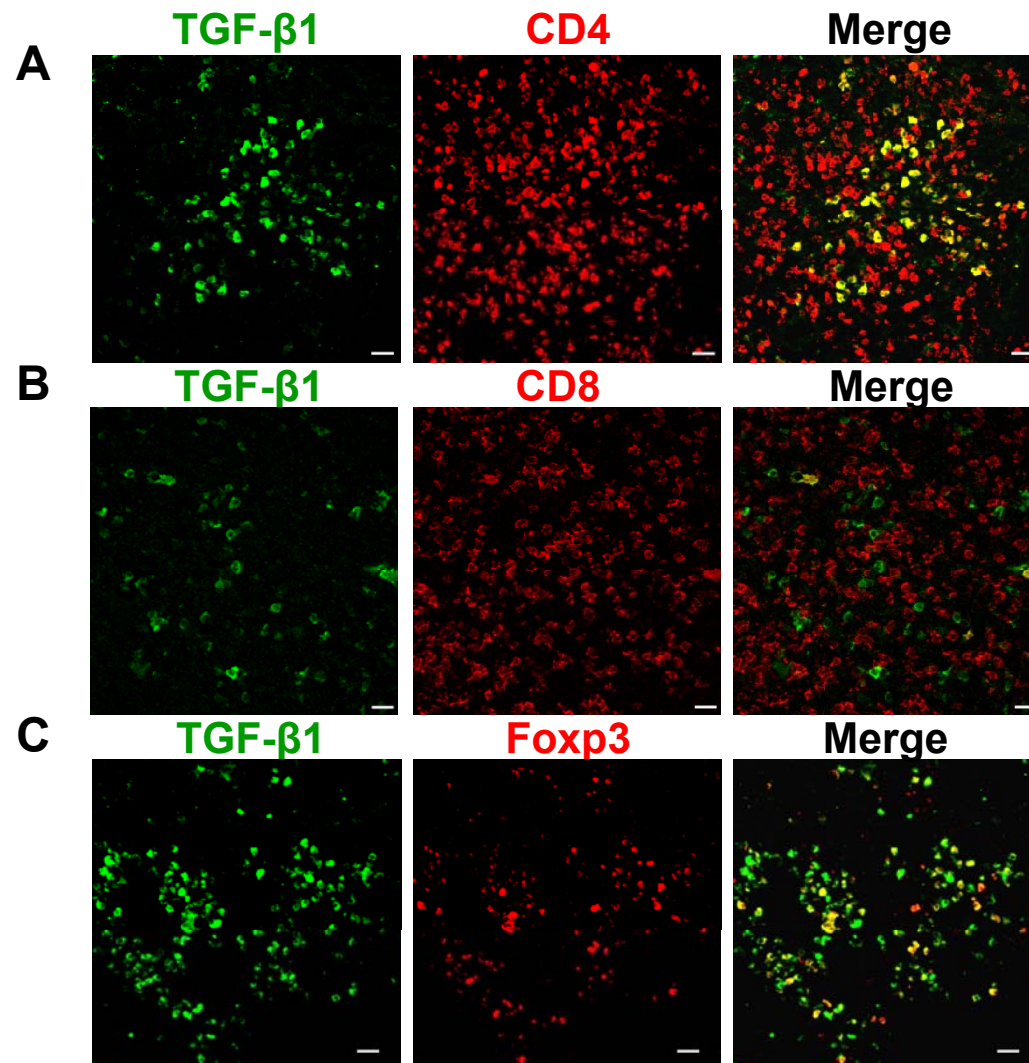



# Supplemental Figure 9

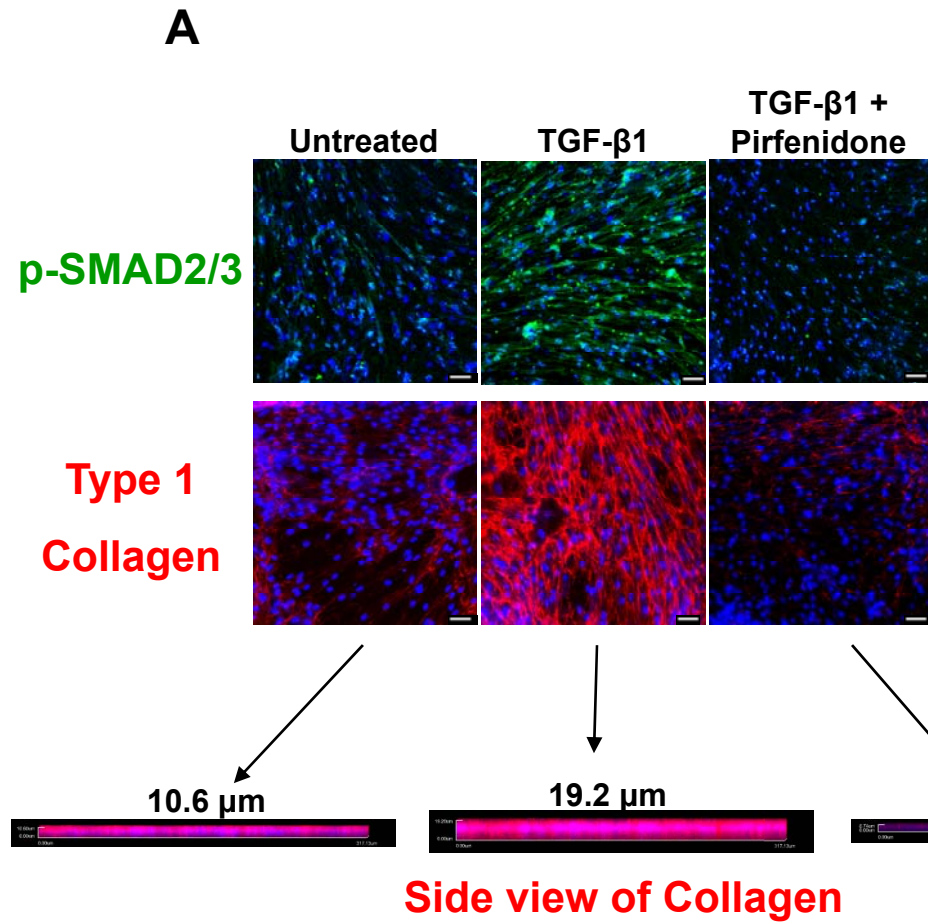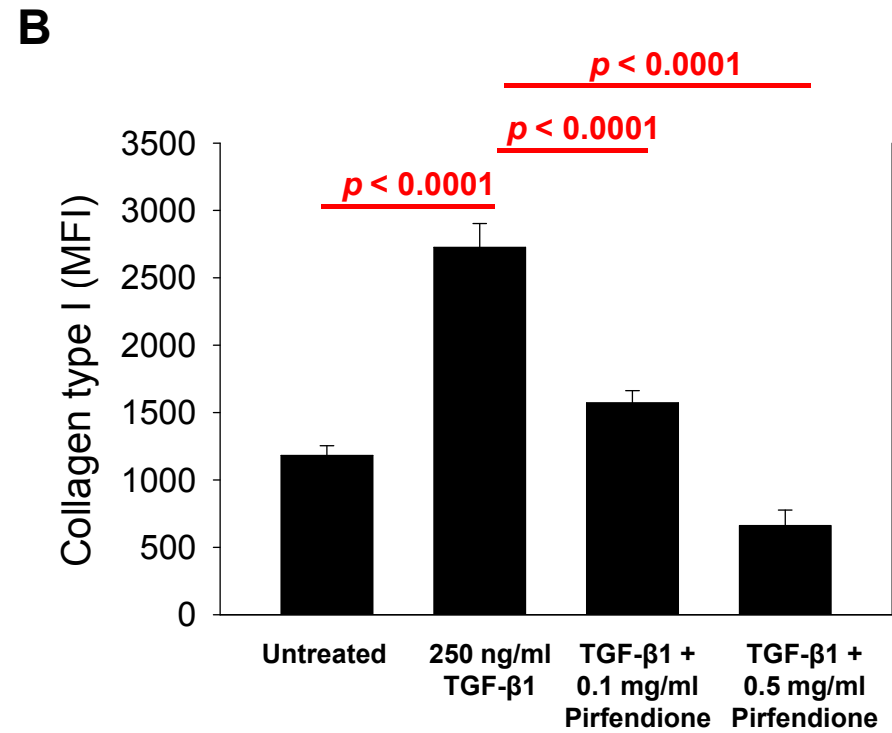

# Supplemental Figure 10

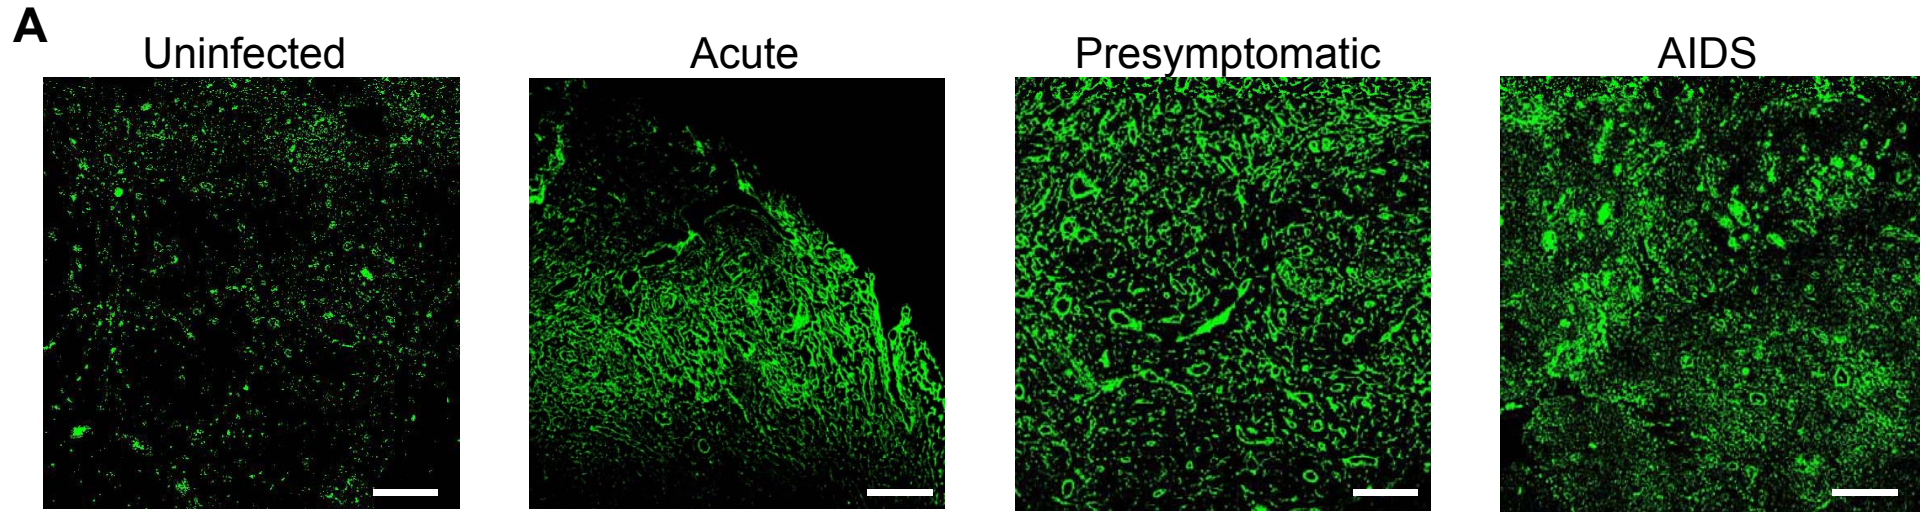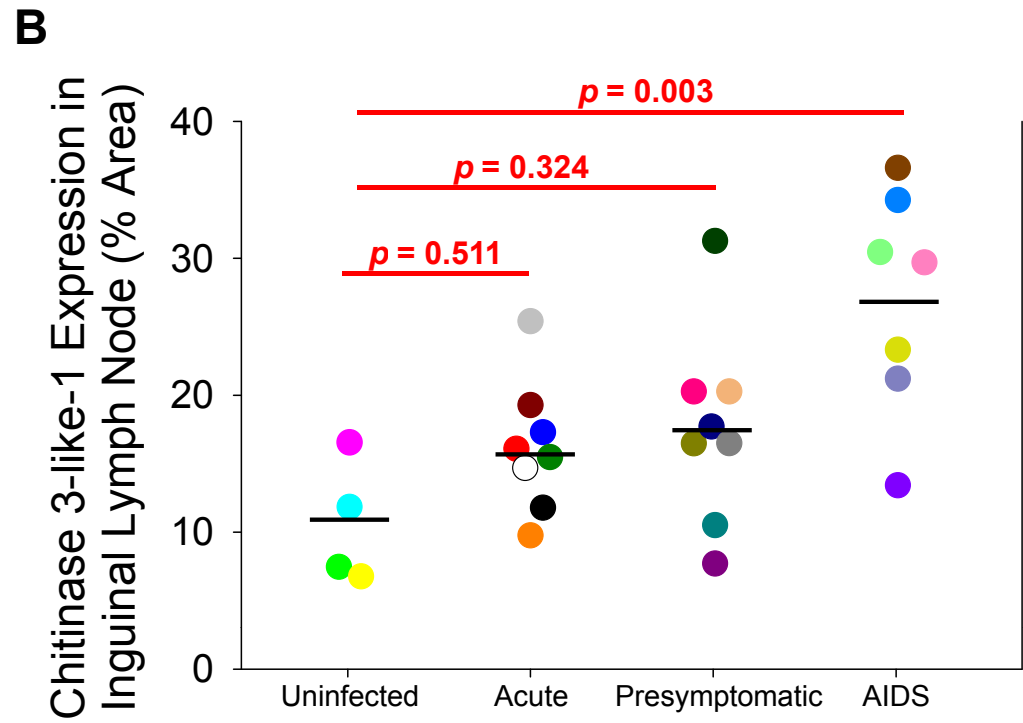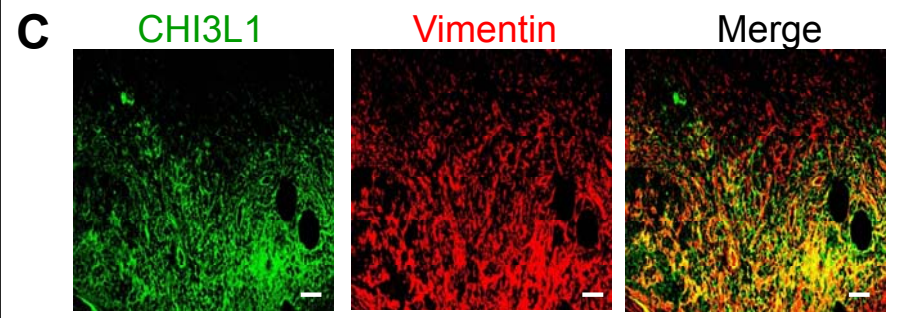

# Supplemental Figure 11

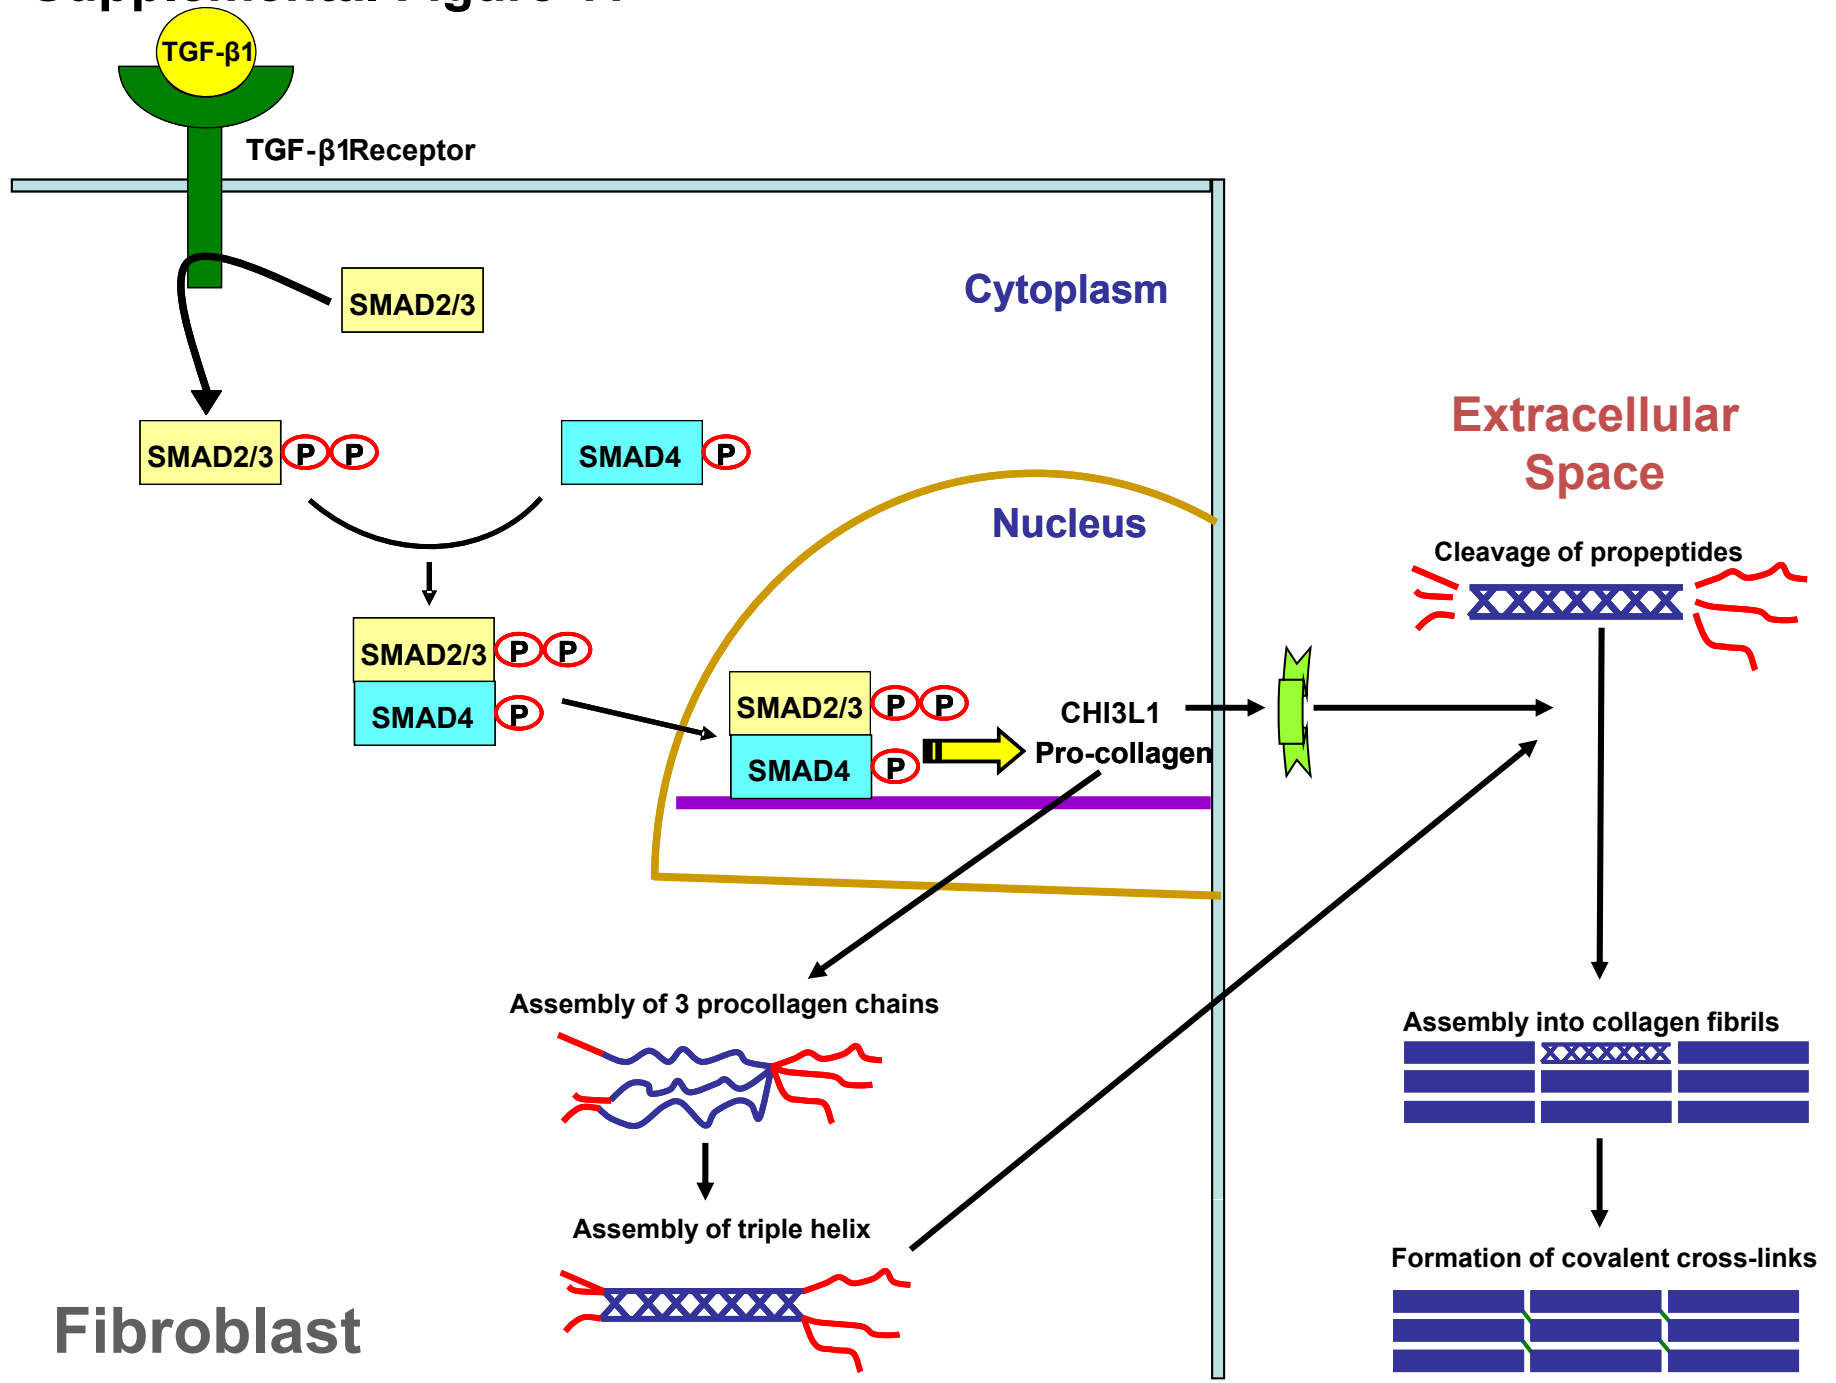

## **Supplemental Figure 1. Mechanisms of LT fibrosis and damage to the LT niche and**

**depletion of T cells. (A)** Chronic immune activation in HIV-1 and SIV infections is thought to deplete T cells through increased activation-induced cell death, but immune activation also elicits a T regulatory response that activates TGF- $\beta$ 1 signaling in fibroblasts resulting in cumulative collagen deposition. Collagen deposition impedes access of T cells to the survival factor IL-7 on the FRC network to cause increased apoptosis, which, along with activation-induced cell death, depletes T cells. Depletion of T cells decreases LT $\beta$ , which, along with collagen-impeded access to LT $\beta$  for FRCs, results in loss of FRC network and IL-7. This vicious cycle of survival interdependencies and collagen deposition cause progressive T cell depletion, particularly in the naïve T cell populations. **(B)** HAART can suppress the loss of CD4<sup>+</sup> T cells due to the direct effects of infection and normalize immune activation to reduce losses of CD4<sup>+</sup> T cells due to activation-induced cell death. However, pre-existing collagen, loss of FRC

network and T cell depletion will limit immune reconstitution by the continued cyclical mechanisms shown in (A).

**Supplemental Figure 2. FRCs and FDCs are the major sources of IL-7 in LTs. (A)**

Quantitative image analysis of the percentage of the IL-7 mRNA signal that co-localizes with desmin+ FRCs in T cell zone and FDCs in the B cell follicles. Values are the mean of the

percentage of the IL-7 mRNA signal that co-localizes with desmin+ cells  $\pm$  s.d. (B) Confocal

image of LN sections from uninfected RMs (representative image for one animal of 3) double immunofluorescently stained for IL-7 (green) and CD1a, CD11c or CD68 (red), showing a small portion of IL-7 is produced by a subset of dendritic cells or macrophages. Scale bar, 30  $\mu$ m.

**Supplemental Figure 3. T cells lose contact with FRCs during SIV infection. (A-B)**

Optical 3D slice showing green stained FRC network and red-stained CD3 T cells in (A) an uninfected

RM (representative image for one animal of 3) and (B) a SIV-infected RM at 180 dpi

(representative image for one animal of 4). In the infected animal, much of the FRC network has been lost and T cells are not in contact with FRCs. Scale bar, 20  $\mu$ m per divide.

**Supplemental Figure 4. Loss of FRCs is associated with decreased IL-7 and depletion of naïve T cells within LNs in SIV infection. (A-B)**

Immunohistochemical staining of (A) IL-7 and (B) desmin in LNs from RMs at different time points post infection. Red arrow points to residual

IL-7 and residual FRCs at the B-T cell zone border (representative image for one of 4 animals at

each time point). Scale bar, 40  $\mu$ m. (C) Montage image of confocal images of LN section from

RMs at 294 dpi stained for CD45RA (red) and CD3 (blue) showing that the residual naïve T

cells reside at the B-T border. Scale bar in the inset, 20  $\mu$ m. (D-E) Confocal image of LN

sections from uninfected RMs (representative image for one of 4 animals) and RM at 294 dpi

stained for CD45RA (green) and CD4 or CD8 (red), showing the progressive and parallel loss of

naïve CD4+ and CD8+ T cells within LTs during SIV infection. Scale bar, 30  $\mu$ m. (F)

Quantification of the number of total CD4<sup>+</sup> and CD8<sup>+</sup> T cells and CD45RA<sup>+</sup> naïve CD4<sup>+</sup> and CD8<sup>+</sup> T cells before and in the chronic phase of infection. Note the rate of the loss of naïve CD8<sup>+</sup> T cells is parallel to the loss of naïve CD4<sup>+</sup> T cells. (Two-tailed *t* test, n=5, values are the mean of the number of cells  $\pm$  s.d.).

**Supplemental Figure 5. LT $\beta$ R-Ig treatment and T cell depletion leads to FRC depletion in mouse LNs.** (A-C) ER-TR-7 staining in LN sections from mice (representative image for one animal of 3) treated with two weekly injections of control IgG (A), two weekly injections of LT $\beta$ R-Ig (B), or with 8 weekly injections of CD3 depleting antibody (C). Scale bar, 300  $\mu$ m. (D-F) Magnified images of (A-C) respectively. Scale bar, 30  $\mu$ m. (G) Quantification of percent area of FRCs in control, LT $\beta$ R-Ig treated or CD3 depleting antibody-treated mice. Data are expressed as the mean  $\pm$  s.d..

**Supplemental Figure 6. Fibroblasts are the major producers of type I collagen within LT during HIV-1 infection.** (A) Immunofluorescent images of pro-collagen (red staining) and vimentin (green staining) in the LT from an HIV-1 infected individual in the presymptomatic stage of disease, showing co-localization between pro-collagen and vimentin<sup>+</sup> fibroblasts (representative image for one of 4 subjects). Scale bars: 50  $\mu$ m. (B) Immunohistochemical images of vimentin staining (brown) combined with ISH of type I collagen mRNA (yellow/green appearing silver grains due to epipolarized reflected light). Red arrows indicate co-localization between vimentin<sup>+</sup> fibroblasts and collagen type I mRNA (representative image for one of 4 subjects in presymptomatic stage). Sense probe shows the negative control staining. Scale bars: 20  $\mu$ m. (C) Immunofluorescent images of vimentin (green staining) and type I collagen (red staining) in primary human fibroblasts isolated from tonsillar tissue from an uninfected individual, revealing basal levels of extracellular type I collagen from an ex vivo culture system 2 days post isolation. Cell nuclei appear blue (DAPI). Scale bars: 30  $\mu$ m.

**Supplemental Figure 7. TGF- $\beta$ 1 expression occurs predominantly in CD3<sup>+</sup> T cells while components of the TGF- $\beta$ 1 signaling pathway (TGF- $\beta$ 1 RII, p-SMAD2/3) are expressed in vimentin<sup>+</sup> fibroblasts.** Immunofluorescent images of (A) TGF- $\beta$ 1 (green staining) and CD3 (red staining), (B) TGF- $\beta$ 1 RII (red staining) and vimentin (blue staining), (C) p-SMAD 2/3 (red staining) and vimentin (green staining) and (D) TGF- $\beta$ 1 (green staining) and vimentin (blue staining) in LT from HIV-1 infected individuals (representative image for one of 4 subjects), showing the close spatial proximity between TGF- $\beta$ 1-expressing CD3<sup>+</sup> T cells and vimentin<sup>+</sup> fibroblasts expressing the TGF- $\beta$ 1 RII. Scale bars: 20  $\mu$ m.

**Supplemental Figure 8. TGF- $\beta$ 1 is mainly produced by CD4<sup>+</sup> / Foxp3<sup>+</sup> T regulatory cells.** (A) Immunofluorescent images of TGF- $\beta$ 1 (green staining) and CD4 (red staining), (B) TGF- $\beta$ 1 (green staining) and CD8 (red staining), (C) TGF- $\beta$ 1 (green staining) and Foxp3 (red staining) in LTs from HIV-1 infected individuals (representative image for one of 4 subjects), showing TGF- $\beta$ 1 expression primarily in CD4<sup>+</sup> Foxp3<sup>+</sup> T regulatory cells. Scale bars: 20  $\mu$ m.

**Supplemental Figure 9. TGF- $\beta$ 1 stimulates the production of type I collagen by LT fibroblasts.** (A) Immunofluorescent images of p-SMAD2/3 (green staining) and collagen type I (red staining) in primary human fibroblasts treated with or without TGF- $\beta$ 1 (250 ng/ml) for 48 hr. Addition of the anti-fibrotic drug, pirfenidone (0.1 or 0.5 mg/ml), inhibits the TGF- $\beta$ 1 signaling pathway and decreases collagen type I production (representative image of 10 images). Cell nuclei appear blue (DAPI). Side views of individual collagen type I fibers were captured to display the relative thickness of the extracellular collagen networks in primary LT fibroblasts. Scale bars: 50  $\mu$ m. (B) The extracellular collagen type I networks of primary human fibroblasts were quantified for each condition and reported as collagen type I Mean Fluorescence Intensity (MFI). Data are expressed as the mean  $\pm$  s.d., where 3 independent experiments were performed in quadruplicate. The results are shown with significance where applicable ( $p < 0.05$ ).

**Supplemental Figure 10. CHI3L1 progressively increases within LTs during HIV-1**

**infection.** (A) Immunofluorescent images reveal progressive increases in CHI3L1 (green staining) within LT during HIV-1 infection (representative image for all the subjects at each stage). Scale bars: 200  $\mu\text{m}$ . (B) CHI3L1 expression was quantified in each LN biopsy and reported as percent tissue area positive for CHI3L1. The results are shown with significance where applicable ( $p < 0.05$ ). Mean values for each group are indicated by horizontal black bars. (C) Immunofluorescent images of CHI3L1 (green staining) and vimentin (red staining) in the LT from an HIV-1 infected individual in the presymptomatic stage of disease (representative image for one of 4 subjects), showing co-localization between CHI3L1 and vimentin+ fibroblasts. Scale bars: 50  $\mu\text{m}$ .

**Supplemental Figure 11. A model of fibrosis within LT during HIV-1 infection.** Increases in TGF- $\beta$ 1-expressing T regulatory cells and its cognate receptor in fibroblasts result in amplification of the TGF- $\beta$ 1 signaling pathway. This leads to increased production of pro-collagen and CHI3L1, a protein which can enhance the maturation of pro-collagen into collagen fibrils. Collectively, these changes accelerate the pathological process of fibrosis.



## Supplemental Tables

**Supplemental Table 1 Demographic characteristics and clinical information of subjects**

| <b>Patient</b> | <b>Disease Stage</b> | <b>Gender</b> | <b>Age</b> | <b>Race</b>      | <b>Peripheral Blood CD4<sup>+</sup> T Cell Count (Cells/<math>\mu</math>l)</b> | <b>Plasma HIV-1 RNA Levels (Copies/ml)</b> |
|----------------|----------------------|---------------|------------|------------------|--------------------------------------------------------------------------------|--------------------------------------------|
| 1425           | Uninfected           | Male          | 43         | Caucasian        | 1,351                                                                          | Undetectable                               |
| 1442           | Uninfected           | Female        | 45         | Caucasian        | 485                                                                            | Undetectable                               |
| 1476           | Uninfected           | Female        | 28         | Caucasian        | 704                                                                            | Undetectable                               |
| 1472           | Uninfected           | Female        | 52         | Caucasian        | 837                                                                            | Undetectable                               |
| 1455           | Acute                | Male          | 23         | African American | 209                                                                            | 19,400                                     |
| 1391           | Acute                | Male          | 37         | African American | 234                                                                            | 24,718                                     |
| 1389           | Acute                | Male          | 32         | Caucasian        | 824                                                                            | 32,173                                     |
| 1449           | Acute                | Male          | 30         | Caucasian        | 333                                                                            | > 100,000                                  |
| 1484           | Acute                | Male          | 49         | Caucasian        | 301                                                                            | 23,721                                     |
| 1469           | Acute                | Male          | 44         | Caucasian        | 201                                                                            | >100,000                                   |
| 1458           | Acute                | Male          | 51         | Caucasian        | 400                                                                            | 439,000                                    |
| 1435           | Acute                | Male          | 42         | Caucasian        | 410                                                                            | > 100,000                                  |
| 1086           | Asymptomatic         | Male          | 30         | Caucasian        | 512                                                                            | 20,562                                     |
| 1293           | Asymptomatic         | Male          | 36         | Caucasian        | 905                                                                            | 14,225                                     |
| 1419           | Asymptomatic         | Male          | 37         | Caucasian        | 245                                                                            | 61,432                                     |
| 1428           | Asymptomatic         | Male          | 30         | Caucasian        | 363                                                                            | 38,600                                     |
| 1436           | Asymptomatic         | Male          | 63         | Caucasian        | 248                                                                            | 46,400                                     |
| 1459           | Asymptomatic         | Male          | 36         | Caucasian        | 286                                                                            | > 100,000                                  |

|      |              |        |    |                  |     |           |
|------|--------------|--------|----|------------------|-----|-----------|
| 1317 | Asymptomatic | Male   | 31 | Caucasian        | 399 | 120,469   |
| 1479 | Asymptomatic | Male   | 42 | Caucasian        | 273 | 1,650     |
| 1413 | AIDS         | Male   | 50 | African American | 42  | 59,401    |
| 1438 | AIDS         | Male   | 49 | Caucasian        | 147 | 4,960     |
| 1462 | AIDS         | Male   | 43 | Caucasian        | 81  | 35,000    |
| 1327 | AIDS         | Female | 40 | African American | 112 | 12,046    |
| 1446 | AIDS         | Female | 45 | Caucasian        | 200 | 150,500   |
| 1474 | AIDS         | Male   | 40 | African American | 98  | 10,000    |
| 1263 | AIDS         | Male   | 44 | Caucasian        | 3   | > 100,000 |

**Supplemental Table 2 List of primary antibodies and antigen retrieval methodologies**

| <b>Antibody</b> | <b>Clone/<br/>Manufacturer &amp;<br/>Catalog #</b> | <b>Antigen-retrieval<br/>Pretreatment</b>                     | <b>Antibody<br/>Dilution</b> | <b>Species</b> |
|-----------------|----------------------------------------------------|---------------------------------------------------------------|------------------------------|----------------|
| Desmin          | D33 /<br>Lab Vision &<br># MS-376-S1               | Diva Decloaker; High pressure cooker for 30 seconds at 125°C. | 1/200                        | Mouse          |
| Desmin          | Polyclonal /<br>Lab Vision &<br># RB-9014-P1       | Diva Decloaker; High pressure cooker for 30 seconds at 125°C. | 1/200                        | Rabbit         |
| CD35            | Ber-MAC-DRC /<br>Dako &<br># M0846                 | Diva Decloaker; High pressure cooker for 30 seconds at 125°C. | 1/100                        | Mouse          |

|                     |                                              |                                                                                                    |       |        |
|---------------------|----------------------------------------------|----------------------------------------------------------------------------------------------------|-------|--------|
| CD21                | 1F8 /<br>Dako /<br># M0784                   | Diva Decloaker; High pressure cooker for 30 seconds at 125°C.                                      | 1/100 | Mouse  |
| ER-TR7              | ER-TR7 /<br>Acris Antibodies &<br># BM4018   | Frozen tissue, Diva Decloaker; Water bath for 5 min at 95°C.                                       | 1/200 | Rat    |
| CD3                 | MCA147 /<br>AbD Serotec &<br># MCA1477       | Diva Decloaker; High pressure cooker for 30 seconds at 125°C.                                      | 1/200 | Rat    |
| CD3                 | SP7 /<br>Thermo Scientific &<br># RM-9107-S1 | Diva Decloaker; High pressure cooker for 30 seconds at 125°C.                                      | 1/100 | Rabbit |
| IL-7                | 7417 /<br>R & D Systems &<br># MAB207        | Diva Decloaker; High pressure cooker for 30 seconds at 125°C.<br>Proteinase K treatment for 15 min | 1/100 | Mouse  |
| CD45RA              | 4KB5 /<br>Dako &<br># M0754                  | Diva Decloaker; High pressure cooker for 30 seconds at 125°C.                                      | 1/100 | Mouse  |
| Activated Caspase-3 | 8G10 /<br>Cell Signaling Tech. &<br># 9665   | 1mm EDTA (ph 8); High pressure cooker for 30 seconds at 125°C.                                     | 1/100 | Rabbit |
| Collagen 1          | COL-1 /<br>Sigma &<br># C2456                | Diva Decloaker; High pressure cooker for 30 seconds at 125°C.<br>Protease K (10 µg/ml).            | 1/100 | Mouse  |
| Lymphotoxin-β       | 135105 /<br>R & D Systems &                  | Diva Decloaker; High pressure cooker for 30 seconds at 125°C.                                      | 1/100 | Mouse  |

|               |                                                     |                                                                                               |       |        |
|---------------|-----------------------------------------------------|-----------------------------------------------------------------------------------------------|-------|--------|
|               | # MAB1684                                           |                                                                                               |       |        |
| CD4           | Polyclonal /<br>R & D Systems &<br># AF-379-NA      | Diva Decloaker; High<br>pressure cooker for 30<br>seconds at 125°C.                           | 1/100 | Goat   |
| CD4           | 1F6 /<br>Novacastra &<br># NCL-CD4-1F6              | Diva Decloaker; High<br>pressure cooker for 30<br>seconds at 125°C.                           | 1/100 | Mouse  |
| CD8           | SP16 /<br>Neomarkers &<br># RM-9116-s               | Diva Decloaker; High<br>pressure cooker for 30<br>seconds at 125°C.                           | 1/100 | Rabbit |
| Lymphotoxin-β | Polyclonal /<br>Santa Cruz Biotech. &<br># sc-23561 | Diva Decloaker; High<br>pressure cooker for 30<br>seconds at 125°C.                           | 1/100 | Goat   |
| Vimentin      | Vim 3B4 /<br>DAKO &<br># M7020                      | Diva Decloaker; High<br>pressure cooker for 30<br>seconds at 125°C.                           | 1/100 | Mouse  |
| Vimentin      | Polyclonal /<br>Neomarkers &<br># Rb-9063-P1        | Diva Decloaker; High<br>pressure cooker for 30<br>seconds at 125°C.                           | 1/100 | Rabbit |
| TGF-β1        | Polyclonal /<br>Santa Cruz &<br># SC-146-G          | Diva Decloaker; High<br>pressure cooker for 30<br>seconds at 125°C.<br>Protease K (10 µg/ml). | 1/100 | Goat   |
| Collagen I    | Polyclonal /<br>Abcam &<br># ab292                  | Diva Decloaker; High<br>pressure cooker for 30<br>seconds at 125°C.<br>Protease K (10 µg/ml). | 1/200 | Rabbit |
| Pro-collagen  | M-58 /                                              | Diva Decloaker; High<br>pressure cooker for 30<br>seconds at 125°C.                           | 1/50  | Rat    |

|                         |                                                |                                                                                               |                |                                |
|-------------------------|------------------------------------------------|-----------------------------------------------------------------------------------------------|----------------|--------------------------------|
|                         | Millipore &<br># MAB1912                       | Protease K (10 µg/ml).                                                                        |                |                                |
| TGF-β RII               | Polyclonal /<br>R & D Systems &<br># AF-241-NA | Diva Decloaker; High<br>pressure cooker for 30<br>seconds at 125°C.<br>Protease K (10 µg/ml). | 1/100          | Goat                           |
| Ki-67                   | SP6 /<br>Neomarkers &<br># RM-9106-S1          | Diva Decloaker; High<br>pressure cooker for 30<br>seconds at 125°C.                           | 1/200          | Rabbit                         |
| p-SMAD2/3               | Polyclonal /<br>Santa Cruz &<br># SC-11769     | Diva Decloaker; High<br>pressure cooker for 30<br>seconds at 125°C.<br>Protease K (10 µg/ml). | 1/50           | Goat                           |
| CHI3L1                  | Polyclonal /<br>Quidel &<br># 4815             | Diva Decloaker; High<br>pressure cooker for 30<br>seconds at 125°C.<br>Protease K (10 µg/ml). | 1/200          | Rabbit                         |
| IgG Isotype<br>Controls | Dako,<br>Jackson<br>ImmunoResearch             | Diva Decloaker; High<br>pressure cooker for 30<br>seconds at 125°C.<br>Protease K (10 µg/ml). | 1/50-<br>1/200 | Mouse,<br>Rabbit, Rat,<br>Goat |
